# Supplementary material for: Design of a colicin E7 based chimeric zinc-finger nuclease
Source: PubMed Central journal article supplement (PMC4104000; doi:10.1007/s10822-014-9765-8), 2014-06-22
Supplement: 10822_2014_9765_MOESM1_ESM.pdf [file 10822_2014_9765_MOESM1_ESM.pdf]

Electronic Supplementary Information for the manuscript:

## **Design of a colicin E7 based chimeric zinc-finger nuclease**

Eszter Németh<sup>[a]</sup>, Gabriella K. Schilli<sup>[a]</sup>, Gábor Nagy<sup>[b]</sup>, Christoph Hasenhindl<sup>[c]</sup>, Béla Gyurcsik<sup>\*[a],[d]</sup>, Chris Oostenbrink<sup>\*,[b]</sup>,

<sup>a</sup>Department of Inorganic and Analytical Chemistry, University of Szeged, Dóm tér 7, H-6720 Szeged, Hungary

<sup>b</sup>Institute of Molecular Modeling and Simulation, BOKU - University of Natural Resources and Life Sciences, Muthgasse 18, A-1190 Vienna, Austria

<sup>c</sup>Christian Doppler Laboratory for Antibody Engineering, Department of Chemistry, Vienna Institute of BioTechnology, BOKU - University of Natural Resources and Life Sciences, Muthgasse 18, A-1190 Vienna, Austria

<sup>d</sup>MTA-SzTE Bioinorganic Chemistry Research Group of Hungarian Academy of Sciences, Dóm tér 7, H-6720 Szeged, Hungary

Table S1. Sequence of primers used for the mutagenesis.

| primer    | Sequence                                         |
|-----------|--------------------------------------------------|
| GST/2     | 5'-GGTGATCATGTAACCCATCCTGACTTCATG-3'             |
| NColE7-5' | <u>GGAATTC</u> AAACGGAATAAGCCAGGGAAG             |
| KGNK-5'   | <u>GGAATTC</u> AAAGGGAATAAGCCAGGGAA              |
| KGNG-5'   | <u>GGAATTC</u> AAAGGGAATGGGCCAGGGAAGGCAACAGG     |
| GGNK-5'   | <u>GGAATTC</u> GGAGGGAATAAGCCAGGGAAGGCA          |
| GGNG-5'   | <u>GGAATTC</u> GGAGGGAATGGGCCAGGGAAGGCAACAGG     |
| W/A-3'-2. | 5'-GCATTATTTAAGGCCTTATTATTGACAGGTTTTTCCTTTACC-3' |
| T/A-5'-2. | 5'-GGAAGGCAGCTGGTAAAGGAAAACCTGTCAATAATAAG-3'     |
| T/A-5'-3. | 5'-GGAAGGCAGCTGGTAAAGGAGCCCCTGTCAATAATAAG-3'     |
| T/A-3'-2. | 5'-CTTTACCAGCTGCCTTCCCTGGCTTATTCCGTTT-3'         |

Table S2. Linker sequences and energies of the structures with all modeled loops in the straight model. Every linker in the table corresponds to an individual hit in the linker search, and the corresponding best sequence is given. The black bold linkers are selected for the models.

| S1     |                 | straight       |                 | S2           |                 | S2      |        |
|--------|-----------------|----------------|-----------------|--------------|-----------------|---------|--------|
| linker | energy kcal/mol | linker         | energy kcal/mol | linker       | energy kcal/mol | linker  | energy |
| FYYDDI | 114,87          | <b>QGYERLG</b> | <b>113,20</b>   | <b>FEGGS</b> | <b>123,78</b>   | EGGKGG  | 125,88 |
| LGQMQG | 115,25          | LGRGYKG        | 119,12          | DGGDS        | 125,24          | FNGKDG  | 127,24 |
| FEFDDE | 115,98          | DGLGQKM        | 119,22          | AGGNG        | 126,60          | GEHTES  | 127,37 |
| DYEMKI | 117,50          | EEFLAGL        | 119,26          | GEGGV        | 127,01          | LERMNT  | 127,59 |
| AFEFGG | 118,08          | FEFFKWL        | 119,82          | GLEFG        | 127,05          | LEDEEI  | 128,42 |
| MGMKFM | 118,57          | AWMDGRY        | 121,85          | GGEGV        | 127,78          | SRFGFN  | 131,24 |
| FGLEKM | 118,88          | GDEEDEG        | 125,61          | DEEEI        | 128,34          | SGFAFY  | 134,34 |
| FGMYEM | 119,19          | MFGEEWS        | 129,43          | DGGGL        | 128,37          | AEEEEET | 135,03 |
| GGDEID | 119,19          | GGFKDGL        | 131,21          | FEGGS        | 128,72          | GQRFMN  | 135,70 |
| LGKFKG | 119,95          | MGQYQRK        | 132,68          | GEGET        | 128,94          | GGGEGS  | 140,71 |
| MEETEI | 120,33          |                |                 | AGGYG        | 129,25          | GGGDSN  | 141,82 |
| FGDREI | 120,46          |                |                 | DEEEI        | 130,09          | GFGGEY  | 142,33 |
| MGRYFA | 121,36          |                |                 | GGEGG        | 131,44          | GGGFFG  | 151,00 |
| KGREEM | 122,30          |                |                 | GGGKV        | 132,35          |         |        |
| MGREEM | 122,66          |                |                 | GEGGS        | 132,60          |         |        |
| MGDEYD | 123,38          |                |                 | GEFKA        | 133,89          |         |        |
| WGIKEG | 124,39          |                |                 | GEADA        | 135,65          |         |        |
| GRGFMS | 125,07          |                |                 | GGGYG        | 136,76          |         |        |
| WGRSKM | 125,07          |                |                 | GLQGG        | 137,26          |         |        |
| MQDEED | 125,38          |                |                 | EGFKL        | 137,69          |         |        |
| GDGDKW | 131,23          |                |                 | EGGGA        | 138,38          |         |        |
|        |                 |                |                 | GDADT        | 139,06          |         |        |
|        |                 |                |                 | DGLKY        | 141,44          |         |        |
|        |                 |                |                 | QGGGV        | 142,59          |         |        |
|        |                 |                |                 | DFKGG        | 142,60          |         |        |
|        |                 |                |                 | GGGGG        | 160,16          |         |        |
|        |                 |                |                 | SGGGG        | 160,28          |         |        |
|        |                 |                |                 | GGGDG        | 160,74          |         |        |
|        |                 |                |                 | GGGEG        | 168,64          |         |        |
|        |                 |                |                 | GGGGN        | 169,64          |         |        |

Table S3. Linker sequences and energies of the structures with all modeled loops in the reverse model. Every linker in the table corresponds to an individual hit in the linker search, and the corresponding best sequence is given. The black bold linkers are selected for the models.

| R1/1            |                 | reverse      |                 | R2/2              |                 |                  |              |
|-----------------|-----------------|--------------|-----------------|-------------------|-----------------|------------------|--------------|
| linker          | energy kcal/mol | linker       | energy kcal/mol | linker            | energy kcal/mol |                  |              |
| GGGGGGGS        | 165,74          | <b>GGDAF</b> | <b>73,35</b>    | <b>FGTGAWMLLG</b> | <b>63,79</b>    | <b>GRFERGDYG</b> | <b>78,06</b> |
| <b>GGGDGGDQ</b> | <b>166,21</b>   | GFWEQ        | 74,23           |                   |                 | QQFEEQKKG        | 78,36        |
| GGGGGGGD        | 184,53          | DGDEM        | 74,83           |                   |                 | GGFQREERG        | 82,16        |
| GGGGGGGE        | 198,01          | GGDGG        | 76,19           |                   |                 | GNFEKEYRG        | 82,73        |
| GGAGGGGG        | 200,92          | GDDGE        | 76,81           |                   |                 | QIDLHQFG         | 87,62        |
| GGGGGGGD        | 202,27          | GDDEE        | 77,03           |                   |                 |                  |              |
| GGGGGGGG        | 219,53          | GDDEG        | 77,60           |                   |                 |                  |              |
| GGGGGGGG        | 252,27          | GYDEF        | 78,00           |                   |                 |                  |              |
|                 |                 | GGGDF        | 80,15           |                   |                 |                  |              |
|                 |                 | GVDEF        | 80,19           |                   |                 |                  |              |
|                 |                 | GGDGE        | 83,12           |                   |                 |                  |              |
|                 |                 | GGFEQ        | 83,24           |                   |                 |                  |              |
|                 |                 | GGWEE        | 83,37           |                   |                 |                  |              |
|                 |                 | GGGGE        | 84,64           |                   |                 |                  |              |
|                 |                 | GDFEG        | 85,46           |                   |                 |                  |              |
|                 |                 | GGIDE        | 94,33           |                   |                 |                  |              |

Table S4. Detailed result of the mutagenesis. The first column contains the designed N-terminal mutations that diminish the nuclease activity and the second column shows the random mutations that completely cancel the low activity.

| <b>designed mutations</b> | <b>random mutations</b>                                                                |
|---------------------------|----------------------------------------------------------------------------------------|
| R447G/K449G               | H545Y<br>G473S<br>G473C/E488D/L543P<br>L543P<br>E542G                                  |
| K446G/R447G               | S535P<br>E488G-R574Stop<br>V564A<br>E542G<br>D559G                                     |
| K446G/R447G/K449G         | IDIHRGK-LIFTEVNSS<br>GK-VNSSSGRIVTD<br>D557E<br>K567R<br>S474P/E508K<br>V476A<br>K525E |
| T454A                     | N560D/R568G<br>F489L/S535P                                                             |
| T454A/K458A               | R538G                                                                                  |
| K458A/W464A               | D559V                                                                                  |

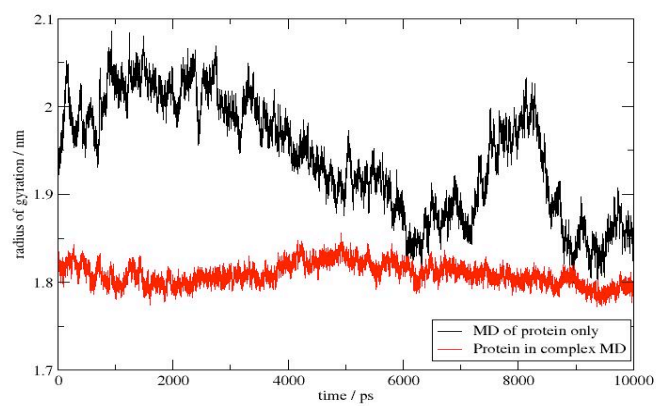

Fig. S1. Radius of gyration in the simulation of N4-ZF-C45 in complex with and in absence of DNA.

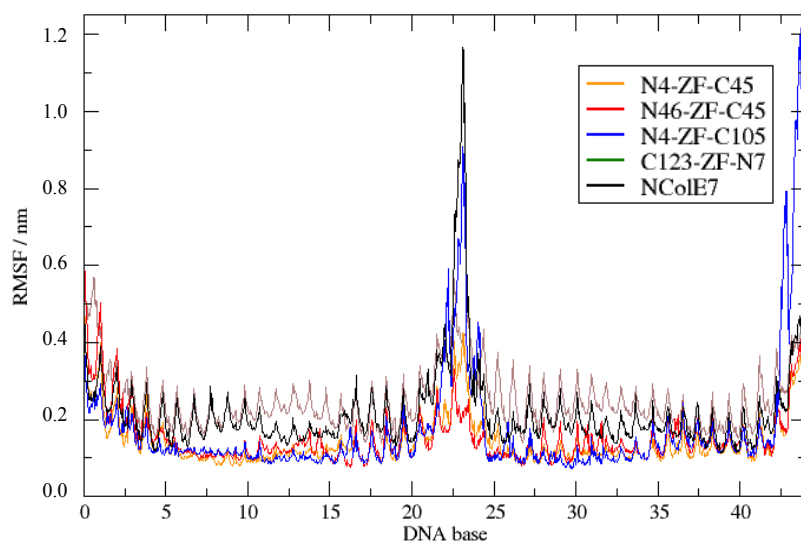

Fig. S2. Atom-positional root-mean-square fluctuations (RMSF) of DNA bases in both strands, in the reverse models. DNA bases 1-23 are paired to bases 46 – 24 in the structures.

B)

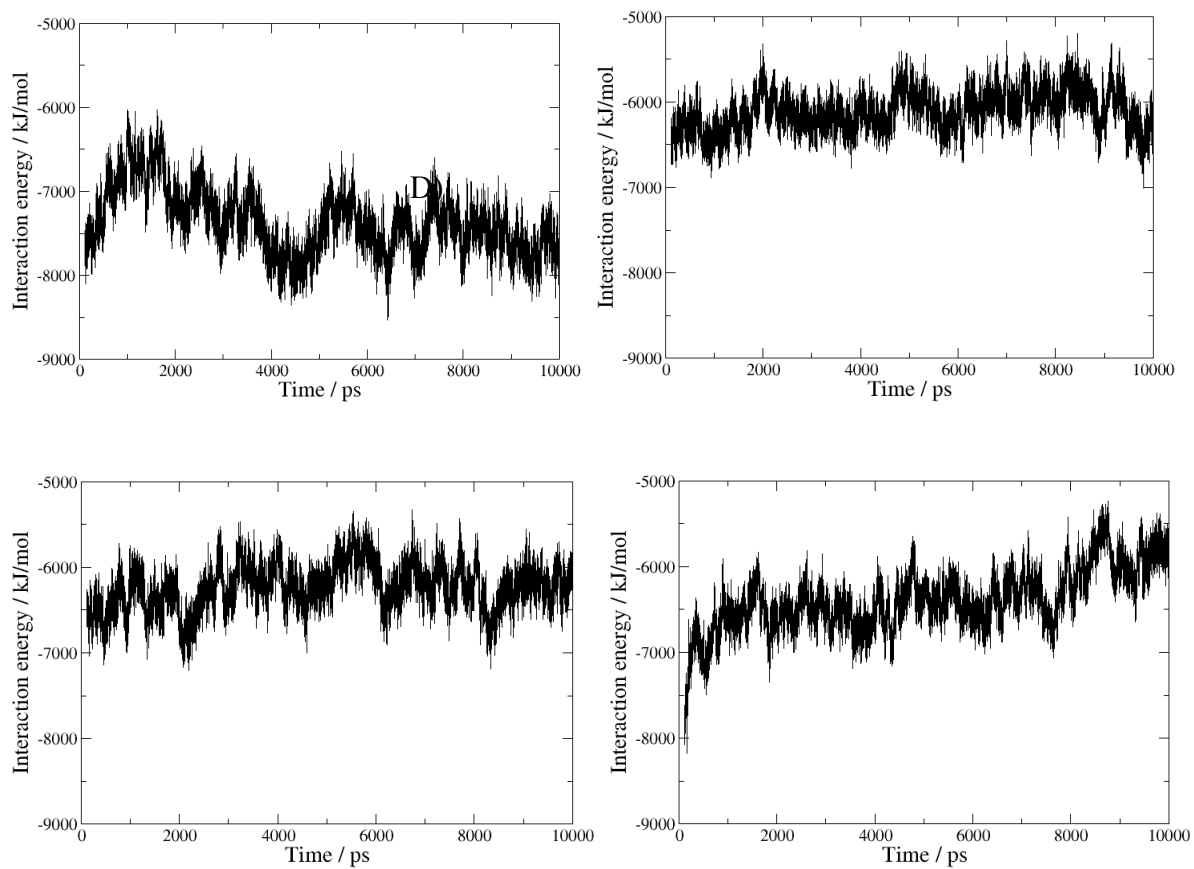

Fig. S3. Interaction energy between the proteins and DNA a) N4-ZF-C105 b) N4-ZF-C45 c) N46-ZF-C45 d) C123-ZF-N7



B)

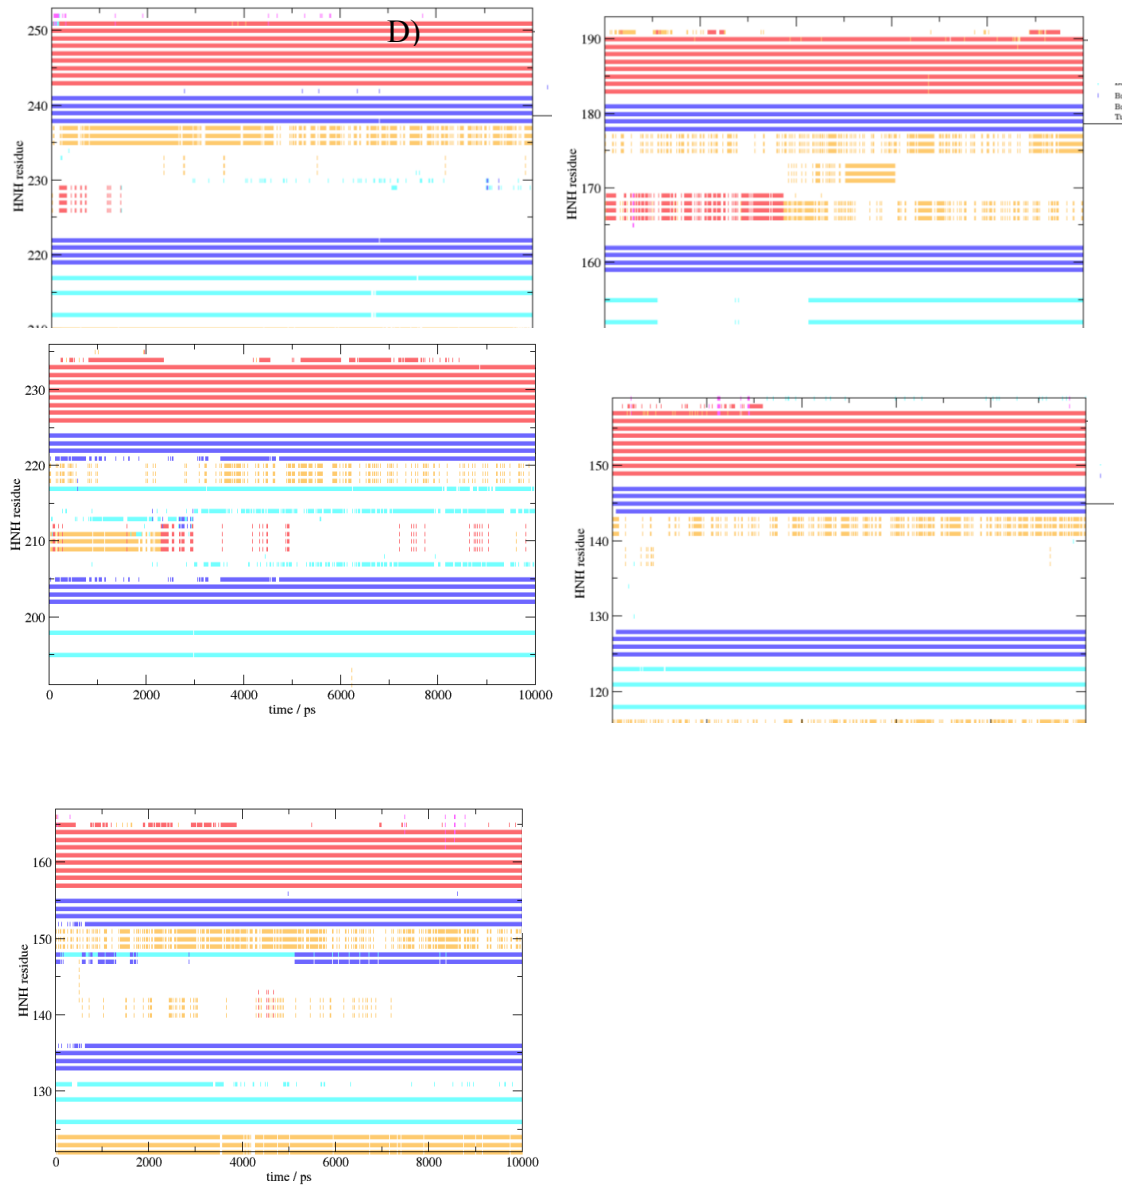

Fig. S4. Secondary structure elements of the HNH motives in NCoIE7 and the ZFN models, in the simulations with DNA: a) N4-ZF-C105 b) N4-ZF-C45 c) N46-ZF-C45 d) C123-ZF-N7 e) NCoIE7. The 3-type helix is in yellow, the 4-type helix in red,  $\beta$ -strands are in blue and  $\beta$ -bridges in light blue.

B)

D)

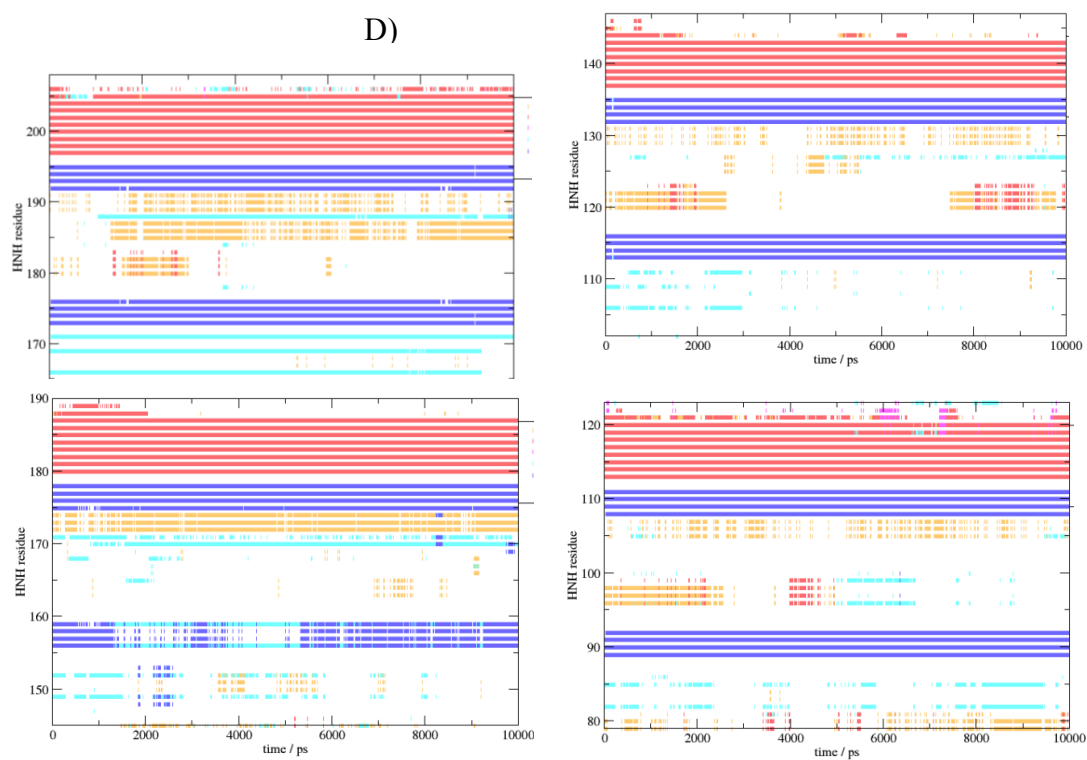

Fig. S5. Secondary structure elements of the HNH motives in NCoIE7 and the ZFN models, in the simulations of free proteins without DNA: a) N4-ZF-C105 b) N4-ZF-C45 c) N46-ZF-C45 d) C123-ZF-N7. The 3-type helix is in yellow, the 4-type helix in red,  $\beta$ -strands are in blue and  $\beta$ -bridges in light blue.

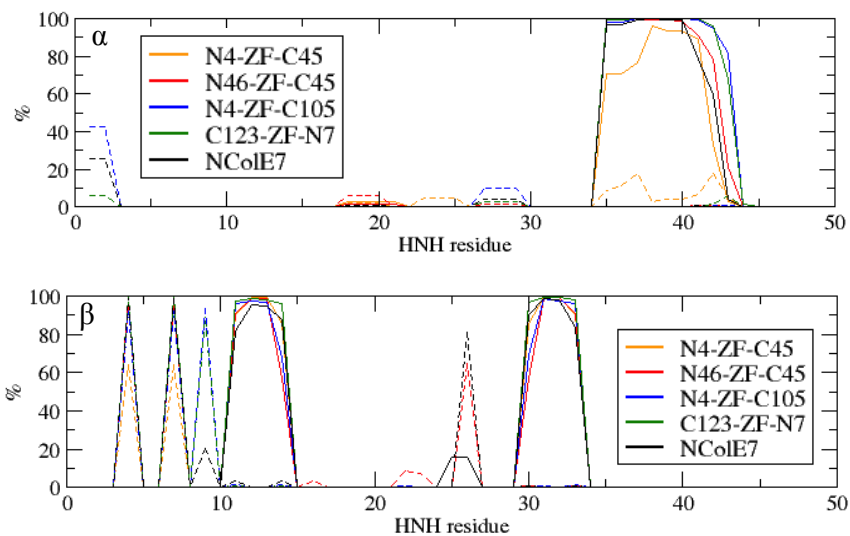

Figure S6. Presence of secondary structure elements as a percent of time for each HNH residues in the different models.
